# Supplementary material
Source: Research Square preprint supplement (doi:10.21203/rs.3.rs-9662499/v1)
Supplement: Supplementary file 1 [file f90f78060a35ba8308e5cda9.docx]

\ln\left(\frac{p}{1 - p}\right) = \beta_0 + \beta_j X_j
